# Supplementary material
Source: publisher figshare collection journal article supplement (https://sage.figshare.com/ndownloader/files/22343994)
Supplement: Supplementary file 1 [file 22343994]

**Supplement Table 1:** PHC-4 Database Codes for Variables Relating to Perioperative Mortality from Stroke.

| <b>Comorbidity</b>                                                 | <b>PHC-4 Variable/ICD-9-CM/ICD-10-CM Codes</b>                                                                                                                                                                                                                                                                                                                                                                                                                                                 |
|--------------------------------------------------------------------|------------------------------------------------------------------------------------------------------------------------------------------------------------------------------------------------------------------------------------------------------------------------------------------------------------------------------------------------------------------------------------------------------------------------------------------------------------------------------------------------|
| Days30 (death within 30 days)                                      | Days to Death > 30 (0)<br>0 ≤ Days to Death ≤ 30 (1)                                                                                                                                                                                                                                                                                                                                                                                                                                           |
| Stk (history of stroke or stroke in hospital) (ICD-9-CM)           | 43301, 43311, 43321, 43331, 43381, 43391, 43401, 43411, 43491, 436, 99702, 430, 431, 4329, V1254                                                                                                                                                                                                                                                                                                                                                                                               |
| Stkd (stroke as a reason for death within 30 days) (ICD-10-CM)     | I60, I61, I62, I63, I64, I65, I66, I67, I68, I69, G45, F01                                                                                                                                                                                                                                                                                                                                                                                                                                     |
| CS (carotid stenosis) (ICD-9-CM)                                   | 43310, 43311                                                                                                                                                                                                                                                                                                                                                                                                                                                                                   |
| AF (atrial fibrillation) (ICD-9-CM)                                | 42731                                                                                                                                                                                                                                                                                                                                                                                                                                                                                          |
| SOB (shortness of breath) (ICD-9-CM)                               | 78605                                                                                                                                                                                                                                                                                                                                                                                                                                                                                          |
| Appetite (loss of appetite) (ICD-9-CM)                             | 7830                                                                                                                                                                                                                                                                                                                                                                                                                                                                                           |
| Diabetes (ICD-9-CM)                                                | 24900, 25000, 25001, 7902, 79021, 79022, 79029, 7915, 7916, V4585, V5391, V6546, 24901, 24910, 24911, 25002, 25003, 25010, 25011, 25012, 25013, 24940, 24941, 25040, 25041, 25042, 25043, 24950, 24951, 25050, 25051, 25052, 25053, 24960, 24961, 25060, 25061, 25062, 25063, 24970, 24971, 25070, 25071, 25072, 25073, 24990, 24991, 25090, 25091, 24920, 24921, 24930, 24931, 24980, 24981, 25020, 25021, 25022, 25023, 25030, 25031, 25032, 25033, 25080, 25081, 25082, 25083, 25092, 25093 |
| HTN (hypertension) (ICD-9-CM)                                      | 4019, 401, 405, 6421, 4010, 4011, 40591, 40599                                                                                                                                                                                                                                                                                                                                                                                                                                                 |
| MI (previous myocardial infarction) (ICD-9-CM)                     | 4100, 41000, 41001, 41002, 4101, 41010, 41011, 41012, 4102, 41020, 41021, 41022, 4103, 41030, 41031, 41032, 4104, 41040, 41041, 41042, 4105, 41050, 41051, 41052, 4106, 41060, 41061, 41062, 4107, 41070, 41071, 41072, 4108, 41080, 41081, 41082, 4109, 41090, 41091, 41092                                                                                                                                                                                                                   |
| Female gender                                                      | Male (0)<br>Female (1)                                                                                                                                                                                                                                                                                                                                                                                                                                                                         |
| Cancer (lymphoma, metastatic cancer, solid tumor w/out metastasis) | Lymphoma = 1 (1)<br>Metastatic Cancer = 1 (1)<br>Solid Tumor W/out Metastasis = 1 (1)                                                                                                                                                                                                                                                                                                                                                                                                          |
| Raco (racial orientation)                                          | Nonwhite (0)<br>White (1)                                                                                                                                                                                                                                                                                                                                                                                                                                                                      |
| Asource (admission source)                                         | Non-Health Care Facility Point of Origin (1)<br>Clinic or Physician's Office (2)<br>Transfer from a Hospital (4)<br>Transfer from Skilled Nursing Facility, Intermediate Care Facility, Assisted Living Facility, Other Health Care Facility (56)<br>Other (7)                                                                                                                                                                                                                                 |
| Procedure (AdType)                                                 | Other (0)<br>Emergency (1)                                                                                                                                                                                                                                                                                                                                                                                                                                                                     |

|                                |                                             |
|--------------------------------|---------------------------------------------|
| Renalfail (renal failure)      | Healthy (0)<br>Renal Failure (1)            |
| Chf (congestive heart failure) | Healthy (0)<br>Congestive Heart Failure (1) |
| Agecat (age category)          | 18 – 64 (1)<br>65 – 85 (2)<br>>85 (3)       |

Supplement Table 1: All covariates are included in the PHC-4 Database as ICD-9-CM codes or ICD-10-CM codes (cause of death). Patients negative for a PHC-4 predetermined variable are represented by a (0) while patients who are were identified with the trait are represented by some positive number (1,2,3, etc.). Any patients with the ICD-9-CM or ICD-10-CM codes represented above qualify for that trait.
